# Supplementary figures and images for: Diagnosis of Two Unrelated Syndromes of Prader-Willi and Calpainopathy Using Uniparental Disomy and Joint Whole Genome Analysis
Source: Preprints.org preprint supplement (doi:10.20944/preprints202406.1485.v1), 2024-06-21

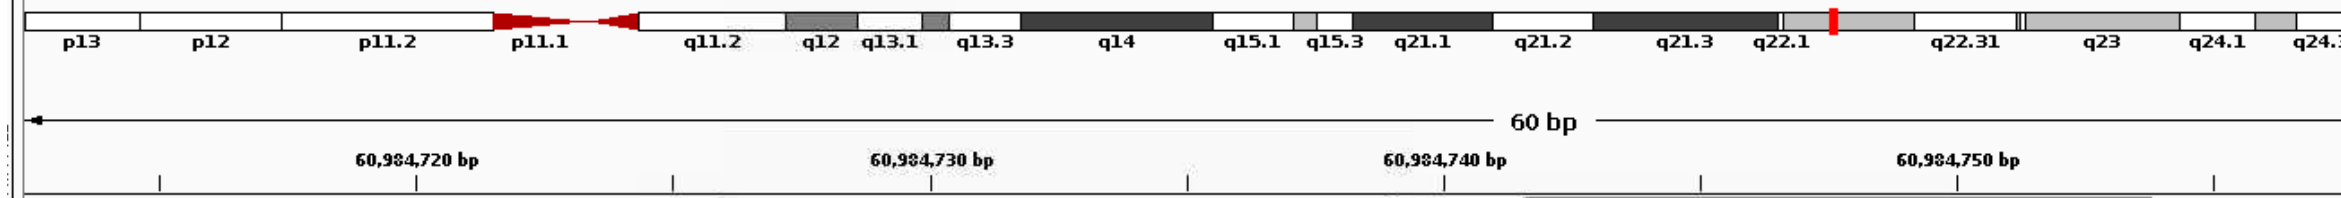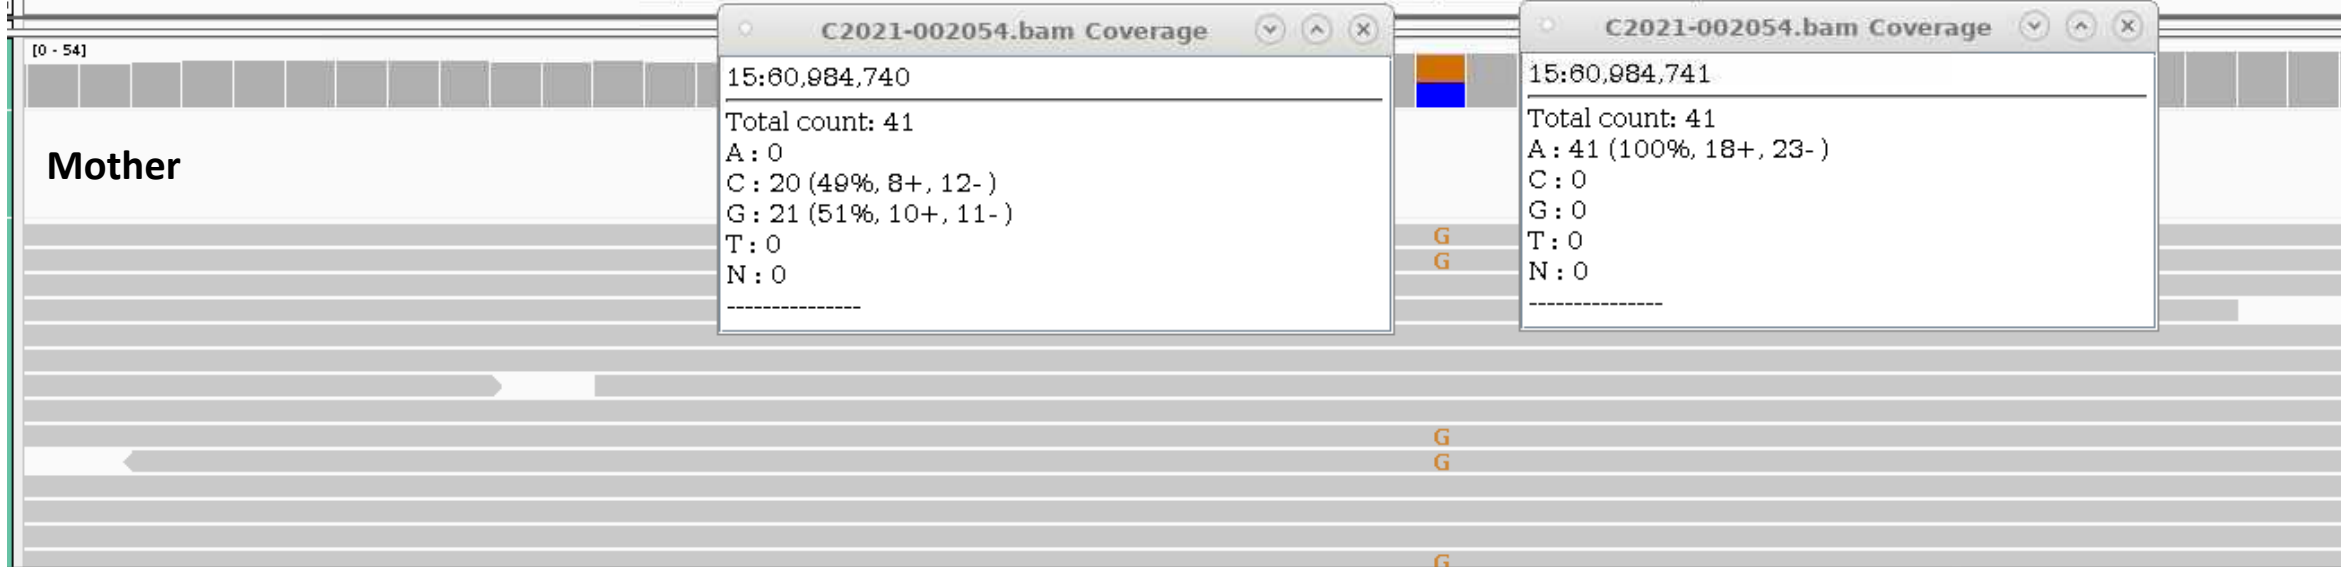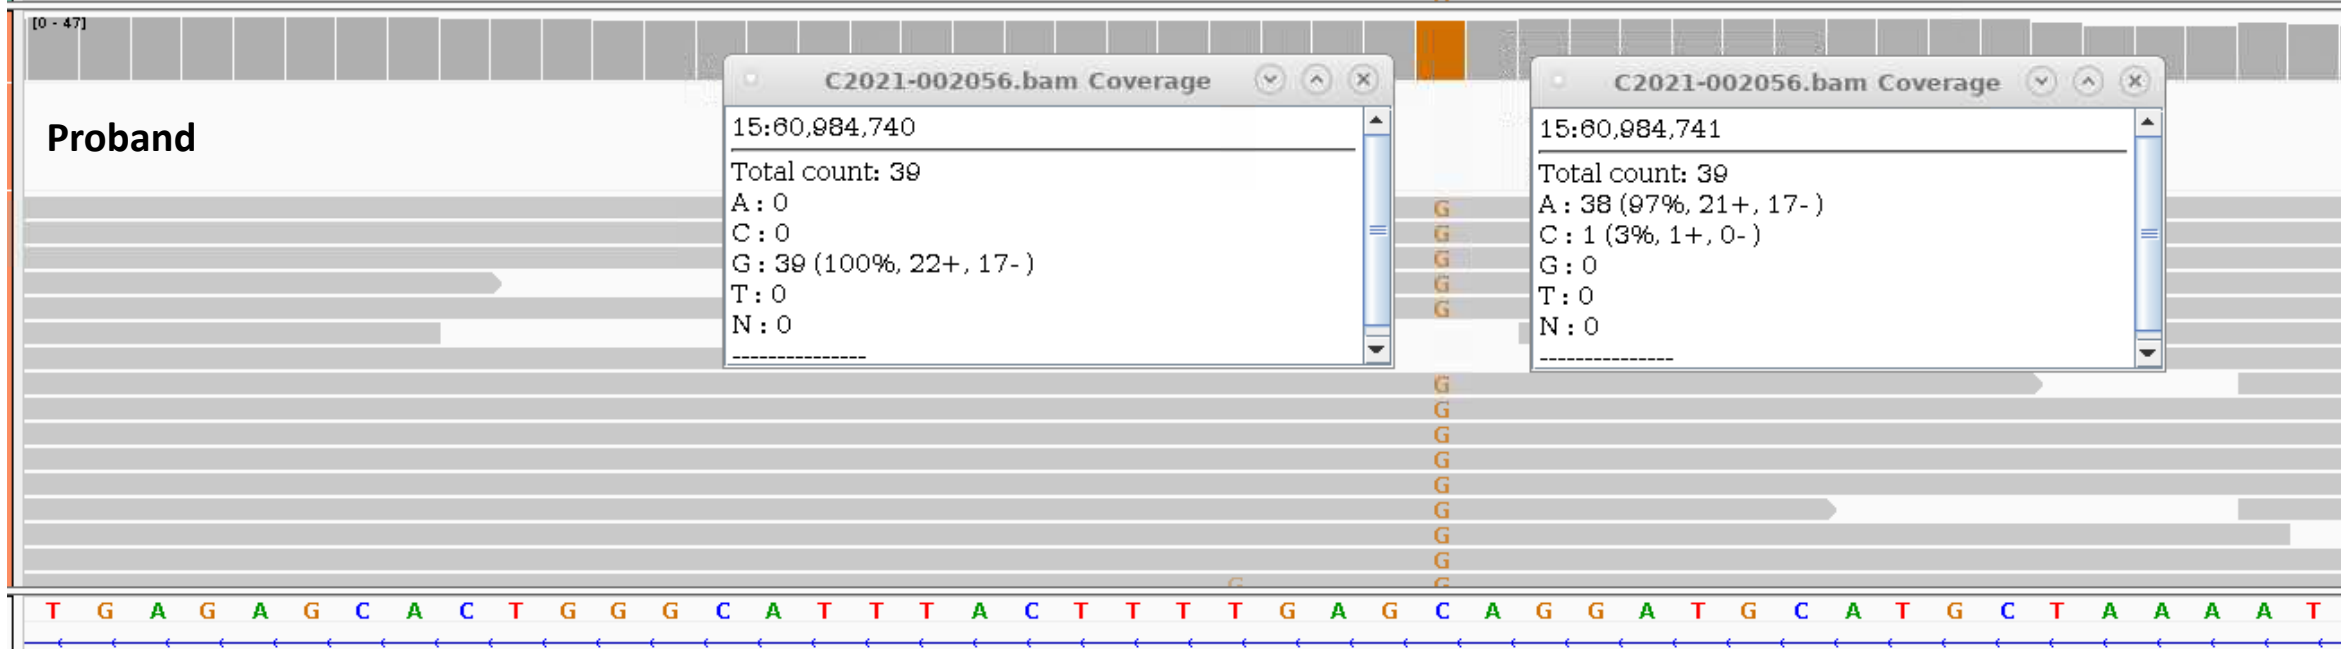

Supplement: Supplementary file 1 [file supplementary]

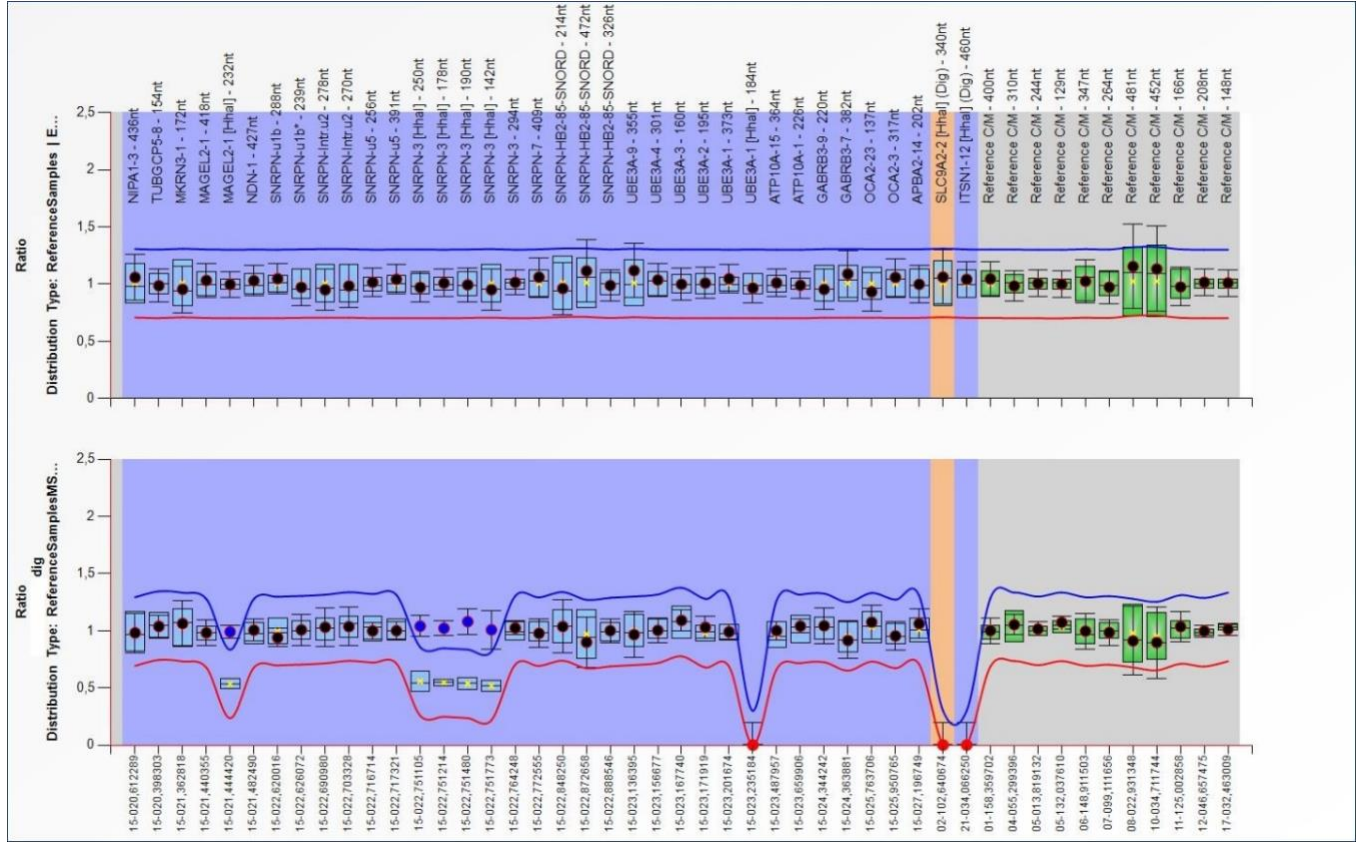

Supplement: Supplementary file 3 [file supplementary]
